# Supplementary material for: Pulp or Peel? Comparative Analysis of the Phytochemical Content and Selected Cosmetic-Related Properties of Annona cherimola L., Diospyros kaki Thumb., Cydonia oblonga Mill. and Fortunella margarita Swingle Pulp and Peel Extracts
Source: MDPI journal article supplement (doi:10.3390/molecules29051133), 2024-03-03

# SUPPLEMENTARY FILE

**Table S1.** The MS/MS spectra recorded for the investigated samples

| Name of the compound                                                           | MS/MS spectrum |
|--------------------------------------------------------------------------------|----------------|
| (Z)-chlorogenic acid                                                           |                |
| 3,5-Di-C-beta-glucopyranosylphoretin                                           |                |
| 3-beta-glucopyra-nosy-loxy-2-hydroxy-1-(4-hydroxy-3-methophe-nyl)-propan-1-one |                |
| Acetin-7-C-neohesperidoside (fortunellin)                                      |                |
| Ascorbyl glucoside                                                             |                |
| Carveol                                                                        |                |
| Chlorogenic acid                                                               |                |

|                      |                                                                                                                                                                                                                                                                                                                                                                                                                                                                                                                                                                                                                                                                                                                                                                                                                                                                                                                                                                                                                                                                                                                                                                                                                                                                                                                                                                                                                                                                                                                                                                                                                                                                                                                                                                                                                                                                                                                                                                                                                                                                                                                                                                                                                                                                                                                                                                                                                                                                                                                                                       |
|----------------------|-------------------------------------------------------------------------------------------------------------------------------------------------------------------------------------------------------------------------------------------------------------------------------------------------------------------------------------------------------------------------------------------------------------------------------------------------------------------------------------------------------------------------------------------------------------------------------------------------------------------------------------------------------------------------------------------------------------------------------------------------------------------------------------------------------------------------------------------------------------------------------------------------------------------------------------------------------------------------------------------------------------------------------------------------------------------------------------------------------------------------------------------------------------------------------------------------------------------------------------------------------------------------------------------------------------------------------------------------------------------------------------------------------------------------------------------------------------------------------------------------------------------------------------------------------------------------------------------------------------------------------------------------------------------------------------------------------------------------------------------------------------------------------------------------------------------------------------------------------------------------------------------------------------------------------------------------------------------------------------------------------------------------------------------------------------------------------------------------------------------------------------------------------------------------------------------------------------------------------------------------------------------------------------------------------------------------------------------------------------------------------------------------------------------------------------------------------------------------------------------------------------------------------------------------------|
| Citric acid          | 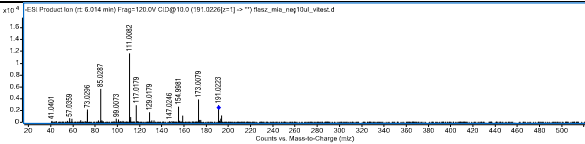 <p>Mass spectrum of Citric acid. The x-axis represents m/z from 20 to 500, and the y-axis represents relative intensity from 0 to 1.5. The base peak is at m/z 111.082. Other labeled peaks include 41.0461, 57.0209, 71.0206, 85.0207, 99.0773, 113.0779, 126.0681, 139.0793, and 151.0223.</p>                                                                                                                                                                                                                                                                                                                                                                                                                                                                                                                                                                                                                                                                                                                                                                                                                                                                                                                                                                                                                                                                                                                                                                                                                                                                                                                                                                                                                                                                                                                                                                                                                                                                                                                                                                                                                                                                                                                                                                                                                                                                                                                                                                   |
| Dehydroascorbic acid |  <p>Mass spectrum of Dehydroascorbic acid. The x-axis represents m/z from 20 to 500, and the y-axis represents relative intensity from 0 to 7. The base peak is at m/z 111.0074. Other labeled peaks include 44.0995, 57.0207, 71.0200, 85.0204, 113.0654, and 127.0295.</p>                                                                                                                                                                                                                                                                                                                                                                                                                                                                                                                                                                                                                                                                                                                                                                                                                                                                                                                                                                                                                                                                                                                                                                                                                                                                                                                                                                                                                                                                                                                                                                                                                                                                                                                                                                                                                                                                                                                                                                                                                                                                                                                                                                                        |
| Epicatechin          |  <p>Mass spectrum of Epicatechin. The x-axis represents m/z from 20 to 2500, and the y-axis represents relative intensity from 0 to 10. The base peak is at m/z 301.0709. Other labeled peaks include 171.0811, 173.0222, 203.0402, 243.0769, 255.0769, 343.0769, 443.0769, 455.0769, 573.0769, 585.0769, 693.0769, 705.0769, 813.0769, 825.0769, 933.0769, 945.0769, 1053.0769, 1065.0769, 1173.0769, 1185.0769, 1293.0769, 1305.0769, 1413.0769, 1425.0769, 1533.0769, 1545.0769, 1653.0769, 1665.0769, 1773.0769, 1785.0769, 1893.0769, 1905.0769, 2013.0769, 2025.0769, 2133.0769, 2145.0769, 2253.0769, 2265.0769, 2373.0769, 2385.0769, 2493.0769, 2505.0769.</p>                                                                                                                                                                                                                                                                                                                                                                                                                                                                                                                                                                                                                                                                                                                                                                                                                                                                                                                                                                                                                                                                                                                                                                                                                                                                                                                                                                                                                                                                                                                                                                                                                                                                                                                                                                                             |
| Eriocitrin           |  <p>Mass spectrum of Eriocitrin. The x-axis represents m/z from 20 to 2500, and the y-axis represents relative intensity from 0 to 4.5. The base peak is at m/z 395.1629. Other labeled peaks include 188.1148, 200.1000, 212.1223, and 224.1223.</p>                                                                                                                                                                                                                                                                                                                                                                                                                                                                                                                                                                                                                                                                                                                                                                                                                                                                                                                                                                                                                                                                                                                                                                                                                                                                                                                                                                                                                                                                                                                                                                                                                                                                                                                                                                                                                                                                                                                                                                                                                                                                                                                                                                                                               |
| Fructose             |  <p>Mass spectrum of Fructose. The x-axis represents m/z from 20 to 500, and the y-axis represents relative intensity from 0 to 1.8. The base peak is at m/z 93.0146. Other labeled peaks include 43.0197, 71.0142, 83.0142, 95.0142, 107.0142, 119.0142, 131.0142, 143.0142, 155.0142, 167.0142, 179.0142, 191.0142, 203.0142, 215.0142, 227.0142, 239.0142, 251.0142, 263.0142, 275.0142, 287.0142, 299.0142, 311.0142, 323.0142, 335.0142, 347.0142, 359.0142, 371.0142, 383.0142, 395.0142, 407.0142, 419.0142, 431.0142, 443.0142, 455.0142, 467.0142, 479.0142, 491.0142, 503.0142, 515.0142, 527.0142, 539.0142, 551.0142, 563.0142, 575.0142, 587.0142, 599.0142, 611.0142, 623.0142, 635.0142, 647.0142, 659.0142, 671.0142, 683.0142, 695.0142, 707.0142, 719.0142, 731.0142, 743.0142, 755.0142, 767.0142, 779.0142, 791.0142, 803.0142, 815.0142, 827.0142, 839.0142, 851.0142, 863.0142, 875.0142, 887.0142, 899.0142, 911.0142, 923.0142, 935.0142, 947.0142, 959.0142, 971.0142, 983.0142, 995.0142, 1007.0142, 1019.0142, 1031.0142, 1043.0142, 1055.0142, 1067.0142, 1079.0142, 1091.0142, 1103.0142, 1115.0142, 1127.0142, 1139.0142, 1151.0142, 1163.0142, 1175.0142, 1187.0142, 1199.0142, 1211.0142, 1223.0142, 1235.0142, 1247.0142, 1259.0142, 1271.0142, 1283.0142, 1295.0142, 1307.0142, 1319.0142, 1331.0142, 1343.0142, 1355.0142, 1367.0142, 1379.0142, 1391.0142, 1403.0142, 1415.0142, 1427.0142, 1439.0142, 1451.0142, 1463.0142, 1475.0142, 1487.0142, 1499.0142, 1511.0142, 1523.0142, 1535.0142, 1547.0142, 1559.0142, 1571.0142, 1583.0142, 1595.0142, 1607.0142, 1619.0142, 1631.0142, 1643.0142, 1655.0142, 1667.0142, 1679.0142, 1691.0142, 1703.0142, 1715.0142, 1727.0142, 1739.0142, 1751.0142, 1763.0142, 1775.0142, 1787.0142, 1799.0142, 1811.0142, 1823.0142, 1835.0142, 1847.0142, 1859.0142, 1871.0142, 1883.0142, 1895.0142, 1907.0142, 1919.0142, 1931.0142, 1943.0142, 1955.0142, 1967.0142, 1979.0142, 1991.0142, 2003.0142, 2015.0142, 2027.0142, 2039.0142, 2051.0142, 2063.0142, 2075.0142, 2087.0142, 2099.0142, 2111.0142, 2123.0142, 2135.0142, 2147.0142, 2159.0142, 2171.0142, 2183.0142, 2195.0142, 2207.0142, 2219.0142, 2231.0142, 2243.0142, 2255.0142, 2267.0142, 2279.0142, 2291.0142, 2303.0142, 2315.0142, 2327.0142, 2339.0142, 2351.0142, 2363.0142, 2375.0142, 2387.0142, 2399.0142, 2411.0142, 2423.0142, 2435.0142, 2447.0142, 2459.0142, 2471.0142, 2483.0142, 2495.0142, 2507.0142.</p> |
| Glucogallin isomer 1 |  <p>Mass spectrum of Glucogallin isomer 1. The x-axis represents m/z from 20 to 2500, and the y-axis represents relative intensity from 0 to 2.5. The base peak is at m/z 331.0621. Other labeled peaks include 161.0222, 173.0222, 185.0222, 197.0222, 209.0222, 221.0222, 233.0222, 245.0222, 257.0222, 269.0222, 281.0222, 293.0222, 305.0222, 317.0222, 329.0222, 341.0222, 353.0222, 365.0222, 377.0222, 389.0222, 401.0222, 413.0222, 425.0222, 437.0222, 449.0222, 461.0222, 473.0222, 485.0222, 497.0222, 509.0222, 521.0222, 533.0222, 545.0222, 557.0222, 569.0222, 581.0222, 593.0222, 605.0222, 617.0222, 629.0222, 641.0222, 653.0222, 665.0222, 677.0222, 689.0222, 701.0222, 713.0222, 725.0222, 737.0222, 749.0222, 761.0222, 773.0222, 785.0222, 797.0222, 809.0222, 821.0222, 833.0222, 845.0222, 857.0222, 869.0222, 881.0222, 893.0222, 905.0222, 917.0222, 929.0222, 941.0222, 953.0222, 965.0222, 977.0222, 989.0222, 1001.0222, 1013.0222, 1025.0222, 1037.0222, 1049.0222, 1061.0222, 1073.0222, 1085.0222, 1097.0222, 1109.0222, 1121.0222, 1133.0222, 1145.0222, 1157.0222, 1169.0222, 1181.0222, 1193.0222, 1205.0222, 1217.0222, 1229.0222, 1241.0222, 1253.0222, 1265.0222, 1277.0222, 1289.0222, 1301.0222, 1313.0222, 1325.0222, 1337.0222, 1349.0222, 1361.0222, 1373.0222, 1385.0222, 1397.0222, 1409.0222, 1421.0222, 1433.0222, 1445.0222, 1457.0222, 1469.0222, 1481.0222, 1493.0222, 1505.0222, 1517.0222, 1529.0222, 1541.0222, 1553.0222, 1565.0222, 1577.0222, 1589.0222, 1601.0222, 1613.0222, 1625.0222, 1637.0222, 1649.0222, 1661.0222, 1673.0222, 1685.0222, 1697.0222, 1709.0222, 1721.0222, 1733.0222, 1745.0222, 1757.0222, 1769.0222, 1781.0222, 1793.0222, 1805.0222, 1817.0222, 1829.0222, 1841.0222, 1853.0222, 1865.0222, 1877.0222, 1889.0222, 1901.0222, 1913.0222, 1925.0222, 1937.0222, 1949.0222, 1961.0222, 1973.0222, 1985.0222, 1997.0222, 2009.0222, 2021.0222, 2033.0222, 2045.0222, 2057.0222, 2069.0222, 2081.0222, 2093.0222, 2105.0222, 2117.0222, 2129.0222, 2141.0222, 2153.0222, 2165.0222, 2177.0222, 2189.0222, 2201.0222, 2213.0222, 2225.0222, 2237.0222, 2249.0222, 2261.0222, 2273.0222, 2285.0222, 2297.0222, 2309.0222, 2321.0222, 2333.0222, 2345.0222, 2357.0222, 2369.0222, 2381.0222, 2393.0222, 2405.0222, 2417.0222, 2429.0222, 2441.0222, 2453.0222, 2465.0222, 2477.0222, 2489.0222, 2501.0222.</p>                                                                         |
| Glucogallin isomer 2 |                                                                                                                                                                                                                                                                                                                                                                                                                                                                                                                                                                                                                                                                                                                                                                                                                                                                                                                                                                                                                                                                                                                                                                                                                                                                                                                                                                                                                                                                                                                                                                                                                                                                                                                                                                                                                                                                                                                                                                                                                                                                                                                                                                                                                                                                                                                                                                                                                                                                                                                                                       |

|                        |                                                                                      |
|------------------------|--------------------------------------------------------------------------------------|
| Hexuronic acid         | 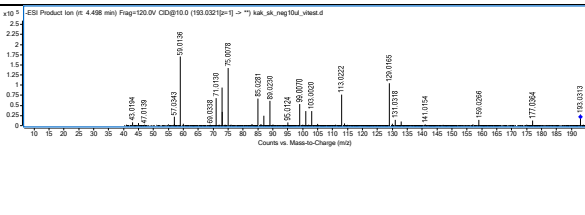   |
| Kaempferol galactoside |    |
| Kaempferol rutinoside  |    |
| Limocitrol             |   |
| Luteolin glucoside     |  |
| Malic acid             |                                                                                      |

|                        |                                                                                                                                                  |
|------------------------|--------------------------------------------------------------------------------------------------------------------------------------------------|
| Proline                | <p>ESI Product Ion (t: 5.287 min) Frag=120.0V CD@10.0 (116.0704[m-1] -&gt; *) fauz_mia_pos10i_vtest.d</p> <p>Counts vs. Mass-to-Charge (m/z)</p> |
| Propylglutaric acid    | <p>ESI Product Ion (t: 25.118 min) Frag=120.0V CD@10.0 (173.0759[m-1] -&gt; *) kak_uk_neg10d_vtest.d</p> <p>Counts vs. Mass-to-Charge (m/z)</p>  |
| Quercetine galactoside | <p>ESI Product Ion (t: 24.400 min) Frag=120.0V CD@10.0 (463.0883[m-1] -&gt; *) pig_uk_neg10d_vtest.d</p> <p>Counts vs. Mass-to-Charge (m/z)</p>  |
| Quinic acid            | <p>ESI Product Ion (t: 4.688 min) Frag=120.0V CD@10.0 (191.0536[m-1] -&gt; *) fiaz_uk_neg10d_vtest.d</p> <p>Counts vs. Mass-to-Charge (m/z)</p>  |
| Rhoiflorin             | <p>ESI Product Ion (t: 23.645 min) Frag=120.0V CD@10.0 (577.1533[m-1] -&gt; *) kam_mia_neg10d_vtest.d</p> <p>Counts vs. Mass-to-Charge (m/z)</p> |
| Rutoside               | <p>ESI Product Ion (t: 23.719 min) Frag=120.0V CD@10.0 (609.1459[m-1] -&gt; *) pig_uk_neg10d_vtest.d</p> <p>Counts vs. Mass-to-Charge (m/z)</p>  |
| Spathulenol            | <p>ESI Product Ion (t: 25.120 min) Frag=120.0V CD@10.0 (221.1905[m-1] -&gt; *) kam_mia_pos10d_vtest.d</p> <p>Counts vs. Mass-to-Charge (m/z)</p> |
| Vicenin                | <p>ESI Product Ion (t: 22.388 min) Frag=120.0V CD@10.0 (353.1473[m-1] -&gt; *) kam_mia_neg10d_vtest.d</p> <p>Counts vs. Mass-to-Charge (m/z)</p> |

Xylonic acid

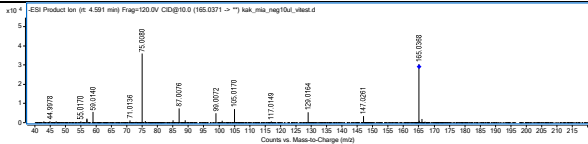

Supplement: s1 [file s1]
